# Supplementary material for: Multi-purpose cash transfers and health among vulnerable Syrian refugees in Lebanon: a prospective cohort study
Source: Springer Nature journal article supplement (doi:10.1186/s12889-021-11196-8), 2021-06-19
Supplement: MOESM4 [file 19275356]

## Health Expenditures for Most Recent Child, Adult Acute, and Adult Chronic Illness Care and in the Preceding Month (USD <sup>a</sup>) at Baseline and Endline

|                                                          | BASELINE           |                           |                        |                           |              | ENDLINE            |                           |                        |                           |              |
|----------------------------------------------------------|--------------------|---------------------------|------------------------|---------------------------|--------------|--------------------|---------------------------|------------------------|---------------------------|--------------|
|                                                          | MPC HHs<br>(N=173) |                           | Control HHs<br>(N=444) |                           | P<br>value   | MPC HHs<br>(N=168) |                           | Control HHs<br>(N=375) |                           | P<br>value   |
|                                                          | Mdn                | Mean (95% CI)             | Mdn                    | Mean (95% CI)             |              | Mdn                | Mean (95% CI)             | Mdn                    | Mean (95% CI)             |              |
| <b>Most Recent Childhood Illness</b>                     |                    |                           |                        |                           |              |                    |                           |                        |                           |              |
| <b>Health Facility Payments for OP Care <sup>b</sup></b> | n=119              |                           | n=268                  |                           |              | n=143              |                           | n=250                  |                           |              |
| Any payment for outpatient care at facility              | --                 | 85.7% (79.3,92.1%)        | --                     | 86.6% (82.5,90.7%)        | 0.822        | --                 | 88.8% (83.6,94.0%)        | --                     | 87.2% (83.0,91.4%)        | 0.639        |
| Total paid at facility for visit (all HHs)               | 13                 | 32.0 (18.7,45.3)          | 13                     | 29.1 (20.7,37.6)          | 0.715        | 15                 | 32.3 (17.1,47.5)          | 12                     | 30.4 (19.3,41.6)          | 0.845        |
| <b>Medication Costs at Pharmacy/Elsewhere</b>            | n=122              |                           | n=271                  |                           |              | n=148              |                           | n=272                  |                           |              |
| Any payment for medication outside facility              | --                 | 52.5% (43.5,61.4%)        | --                     | 48.0% (42.0,54.0%)        | 0.410        | --                 | 68% (60.7,75.8%)          | --                     | 64.3% (58.6,70.1%)        | 0.421        |
| Total paid for medication (all HHs)                      | 7                  | 15.4 (11.0,19.7)          | 0                      | 11.4 (9.0,13.9)           | 0.095        | 10                 | 17.8 (12.6,23.0)          | 11                     | 18.4 (15.1,21.7)          | 0.852        |
| <b>Total Amount Paid for Illness <sup>c</sup></b>        | n=119              |                           | n=268                  |                           |              | n=143              |                           | n=250                  |                           |              |
| Any expense for most recent illness                      | --                 | 84.9% (78.3,91.4%)        | --                     | 81.7% (77.1,86.4%)        | 0.449        | --                 | 89.5% (84.4,94.6%)        | --                     | 88.4% (84.4,92.4%)        | 0.737        |
| Total cost for most recent illness (all HHs)             | <b>22</b>          | <b>44.1 (29.8,58.5)</b>   | <b>20</b>              | <b>29.1 (23.9,34.2)</b>   | <b>0.016</b> | 23                 | 45.6 (29.0,62.3)          | 23                     | 43.9 (32.2,55.7)          | 0.868        |
| <b>Most Recent Acute Adult Illness</b>                   |                    |                           |                        |                           |              |                    |                           |                        |                           |              |
| <b>Health Facility Payments for OP Care <sup>b</sup></b> | n=68               |                           | n=154                  |                           |              | n=107              |                           | n=187                  |                           |              |
| Any payment for outpatient care at facility              | --                 | 94.1% (88.4,99.9%)        | --                     | 87.0% (81.6,92.4%)        | 0.116        | --                 | 82.2% (74.9,89.6%)        | --                     | 87.7% (82.9,92.5%)        | 0.198        |
| Total paid at facility for visit (all HHs)               | 20                 | 34.7 (22.1,47.3)          | 15                     | 44.1 (20.6,67.7)          | 0.609        | <b>13</b>          | <b>47.1 (21.2,72.9)</b>   | <b>13</b>              | <b>24.3 (18.7,29.9)</b>   | <b>0.031</b> |
| <b>Medication Costs at Pharmacy/Elsewhere</b>            | n=68               |                           | n=154                  |                           |              | n=107              |                           | n=187                  |                           |              |
| Any payment for medication outside facility              | --                 | 61.8% (49.9,73.6%)        | --                     | 52.6% (44.6,60.6%)        | 0.205        | --                 | 55.1% (45.6,64.7%)        | --                     | 54.5% (47.3,61.7%)        | 0.921        |
| Total paid for medication (all HHs)                      | 13                 | 18.9 (13.7,24.1)          | 4                      | 16.8 (12.5,21.1)          | 0.576        | 7                  | 17.8 (12.4,23.2)          | 6                      | 17.8 (12.9,22.6)          | 0.999        |
| <b>Total Amount Paid for Illness <sup>c</sup></b>        | n=68               |                           | n=154                  |                           |              | n=107              |                           | n=187                  |                           |              |
| Any expense for most recent illness                      | --                 | 89.7% (82.3,97.1%)        | --                     | 82.5% (76.4,88.5%)        | 0.167        | --                 | 77.6% (69.5,85.6%)        | --                     | 81.8% (76.2,87.4%)        | 0.379        |
| Total cost for most recent illness (all HHs)             | 39                 | 45.2 (34.8,55.7)          | 20                     | 44.4 (30.5,58.4)          | 0.942        | 23                 | 42.8 (27.4,58.2)          | 25                     | 38.3 (31.1,45.5)          | 0.554        |
| <b>Most Recent Adult Chronic Illness Visit</b>           |                    |                           |                        |                           |              |                    |                           |                        |                           |              |
| <b>Health Facility Payments for OP Care <sup>b</sup></b> | n=27               |                           | n=63                   |                           |              | n=61               |                           | n=142                  |                           |              |
| Any payment for outpatient care at facility              | --                 | 70.4% (52.0,88.8%)        | --                     | 68.3% (56.4,80.1%)        | 0.842        | --                 | 75.4% (64.3,86.5%)        | --                     | 78.9% (72.1,85.7%)        | 0.586        |
| Total paid at facility for visit (all HHs)               | 5                  | 39.1 (14.0,64.1)          | 13                     | 31.3 (16.4,46.2)          | 0.576        | 13                 | 36.5 (22.8,50.3)          | 20                     | 40.1 (30.9,49.4)          | 0.670        |
| <b>Average Monthly Medication Costs</b>                  | n=31               |                           | n=76                   |                           |              | n=72               |                           | n=167                  |                           |              |
| Any regular (monthly) medication costs                   | --                 | 64.5% (46.7,82.4%)        | --                     | 69.7% (59.2,80.3%)        | 0.599        | --                 | 69.4% (58.5,80.3%)        | --                     | 74.9% (68.2,81.5%)        | 0.387        |
| Average monthly medication costs (all cases)             | 33                 | 39.1 (22.5,55.7)          | 19                     | 31.8 (20.9,42.8)          | 0.470        | 21                 | 30.6 (22.9,38.3)          | 20                     | 34.7 (27.1,42.3)          | 0.528        |
| <b>Routine Spending on Health</b>                        | n=173              |                           | n=444                  |                           |              | n=168              |                           | n=375                  |                           |              |
| Health Expenditures (past month) <sup>d</sup>            | <b>53</b>          | <b>88 (70.5,104.7)</b>    | <b>37</b>              | <b>60.9 (51.0,70.7)</b>   | <b>0.006</b> | <b>66</b>          | <b>102.2 (83.3,121.0)</b> | <b>60</b>              | <b>82.5 (72.7,92.3)</b>   | <b>0.045</b> |
| Sold assets to pay for health (past 3 months)            | --                 | 3.5% (0.7,6.2%)           | --                     | 3.2% (1.5,4.8%)           | 0.843        | --                 | 6.0% (2.3,9.6%)           | --                     | 10.1% (7.1,13.2%)         | 0.113        |
| Borrowed to pay for health (past 3 months)               | --                 | <b>23.7% (17.3,30.1%)</b> | --                     | <b>15.8% (12.4,19.2%)</b> | <b>0.021</b> | --                 | <b>66.1% (58.8,73.3%)</b> | --                     | <b>50.7% (45.6,55.8%)</b> | <b>0.001</b> |

HH = households; Mdn = median; OP = outpatient. <sup>a</sup> reported in USD; exchange rate: 1507.5 LBP = 1 USD; <sup>b</sup> includes consultation fees, diagnostic testing and medications obtained at health facility during the initial visit to health facility, hospital outpatient department, or emergency room (without overnight stay); <sup>c</sup> includes health facility payments for outpatient care and medications purchased at pharmacies outside health facilities (does not include referrals, in-patient care and transportation); <sup>d</sup> at facilities and for medication
