# Supplementary material for: Multi-purpose cash transfers and health among vulnerable Syrian refugees in Lebanon: a prospective cohort study
Source: BMC Public Health. 2021 Jun 19;21:1176. doi: 10.1186/s12889-021-11196-8 (PMC8214292; doi:10.1186/s12889-021-11196-8)
Supplement: Supplementary file 2 — Additional file 2. Multi-purpose cash transfers and health among vulnerable Syrian refugees in Lebanon: Study Questionnaire. Description: The questionnaire developed and used for this study. [file 12889_2021_11196_MOESM2_ESM.pdf]

# Multi-purpose cash transfers and health among vulnerable Syrian refugees in Lebanon: Study Questionnaire

## 1. SECTION 1. INTERVIEW BACKGROUND INFORMATION

Date of Enrollment

2. Interviewer number

3. UNHCR Case Number from sampling list

4. Assigned sample group

Choose one response

- MPC
- Control

5. Household Study ID

6. Arabic consent script

7. Arabic consent script, continued

8. Do you agree to participate in this study?

Choose one response

- Yes, agree to participate
- No, refuse to participate      If this response, jump to 308
- Yes, agree to participate but asked to postpone interview      If this response, jump to 308

## 9. SECTION 2: INFORMATION ABOUT RESPONDENT AND UNHCR CASE

Identify the Principal Applicant of the case number; if not present, an adult included in the same registration case that is considered capable and reliable for the interview may be interviewed. If possible, select the mother of the children or an adult who is engaged in decision making for the household.

10. Please tell me your UNHCR case number.

INTERVIEWER: Does the case number provided match the sampled case number?

If not, probe to find someone on the sampled case number. If someone on the sampled case number cannot be identified, select "no matching case number not identified" and end the interview.

Choose one response

- Yes, matching case number provided
- No, matching case number not identified      If this response, jump to 308

11. Record UNHCR case number

12. Given Name of Participant

13. Family Surname(s)

14. Cell phone number 1

15. Relationship to phone owner

Choose one response

- Shared household phone
- Self/personal phone

- Another household member's personal phone
- Neighbor
- Other

**16. Alternate cell phone number where participant can be reached**

**17. Relationship to alternate phone owner**

Choose one response

- Shared household phone
- Self/personal phone
- Another household member's personal
- Neighbor
- Other

**18. Respondent sex**

Choose one response

- Male
- Female

**19. How old are you? (in years)**

**20. What is the highest level of education you have completed?**

Choose one response

- No formal schooling
- Some primary school
- Primary school completed
- Preparatory school completed
- Secondary school completed
- College/ University completed
- Don't Know
- Refused

**21. What is your marital status?**

Choose one response

- Married
- Widowed
- Never married
- Divorced
- Refused

**22. What is your relationship to the principal applicant on the UNHCR case?**

Choose one response

- I am the principal applicant      If this response, jump to 26
- Wife/Husband
- Mother/Father
- Daughter/Son
- Brother/Sister
- Father-in-law/Mother-in-law
- Son-in-law/daughter-in-law
- Brother-in-law/Sister-in-law
- Extended family (uncle/aunt/cousin/niece/nephew etc)
- No family relationship – guest

- Other

**23. Is the principal applicant a male or a female?**

Choose one response

- Male
- Female

**24. How old is the principal applicant (in years)?**

**25. What is the highest level of education the principal applicant has completed?**

Choose one response

- No formal schooling
- Some primary school
- Primary school completed
- Preparatory school completed
- Secondary school completed
- College/ University completed
- Don't Know
- Refused

**26. Which governorate do you currently live in?**

Choose one response

- Akkar
- Baalbek-El Hermel
- Beirut
- Bekaa
- El Nabatieh
- Mount Lebanon
- North
- South

**27. Which district do you currently live in?**

Choose one response

- Akkar
- Baalbek
- El Hermel
- Beirut
- Rachaya
- West Bekaa
- Zahle
- Bent Jbeil
- El Nabatieh
- Hasbaya
- Marjaayoun
- Aley
- Baabda
- Chouf
- El Meten
- Jbeil
- Kesrwane
- Bcharre
- El Batroun

- El Koura
- El Minieh'-Dennie
- Tripoli
- Zgharta
- Jezzine
- Saida
- Sour

## **28. Housing Type**

Choose one response

- Apartment/house (finished)
- Single room in apartment/house
- Single room in other location (addition to home, in a workplace location such as garage or farm)
- Unfinished building or construction site
- Factory or warehouse
- Tent or temporary shelter built from other materials
- Prefab unit
- Collective center/shelter

Other

## **29. Occupancy Type**

Choose one response

- Owned If this response, jump to 31
- Rented (direct rent payment) If this response, jump to 31
- Rented (in exchange of work) If this response, jump to 31
- Hosted for free If this response, jump to 31
- Rented/paid for by NGO/charity If this response, jump to 31
- Squatting If this response, jump to 31
- Other (specify)

## **30. Provide description for "other"**

## **31. Excluding bathrooms/toilets, how many rooms does your residence have?**

## **32. SECTION 3: HOUSEHOLD DEMOGRAPHICS**

**READ ALOUD:** Now I will ask you some questions about your household. A household includes people who share a living space AND share meals and financial resources.

**INTERVIEWER:** Probe to ensure the respondent is correctly identifying the household. Households may include more than one UNHCR registration case. Extended family members that share the living space should only be considered household members if they regularly share meals and financial resources. Household members may or may not be biologically related. Short term visitors who stay for less than one month should not be counted household members.

## **33. How many people currently live in this household?**

## **34. How many households live together in this residence?**

## **35. How many people in the household are less than 5 years of age?**

## **36. How many people in the household are age 5 to 17 (including age 17)?**

## **37. How many people in the household are age 18 to 59 (including age 59)?**

**38. How many people in the household are age 60 or higher?**

**39. How many household members have chronic health conditions?**

Chronic health conditions are deteriorations in health which require regular visits to a doctor or regular medication or treatment. For example, hypertension, kidney disease, neurological conditions like stroke or migraines, arthritis, cancer, or mental illness. Some people may have more than one chronic condition, but should be counted once.

**40. How many household members have a disability or special needs (physical, hearing, visual, or mental disability)?**

These are long term conditions which are not likely to change greatly in the next few months and limit normal function of a household member.

**41. How many household members are in need of support to do daily activities due to other conditions (such as frailty or limitations due to old age)?**

**42. How many UNHCR registration cases are in this household?**

A registration case is defined as a group of people that share the same UNHCR registration number (and are listed together on the same registration certificate or were recorded together when you received your token).

**43. Please enter the first additional UNHCR case number in the household**

**44. Please enter the second additional UNHCR case number in the household**

#### **45. SECTION 4: HOUSEHOLD ECONOMY**

**READ ALOUD:** Please estimate your household's expenses in the last month for the following expense categories (in LBP; enter '999' for not disclosed or '0' if household had no expense)

**INTERVIEWER:** if the household has multiple registration cases, remind the respondent to report this information for the entire household (those that live together and share financial resources/meals).

**46. Housing / rent**

**47. Electricity or generator**

**48. Gas / Fuel / Wood (for cooking and heating only)**

**49. Water**

**50. Food**

**51. Consumable household items (toilet paper, soap, etc. Does not include food or larger purchases such as furniture)**

**52. Combined: Food and household items**

**NOTE:** If respondent is unable to separate food and other household item expenditures, enter combined amount. If separate expenditures entered for each category, enter 0.

**53. Telecommunication, internet, mobile subscription**

**54. Transportation**

**55. Health care (consultation fees, diagnostic testing, medicines)**

**56. Education (include transportation and supplies)**

**57. Clothes**

**58. Payment of debt**

**59. Any other large expenses that you have not mentioned? (Enter the amount of other large expenses in the last month)**

**60. Specify other large expenses**

**61. Were your household's expenditures in the past month similar to your usual expenditure levels?**

Choose one response

- Yes        If this response, jump to 63
- No, expenditures were higher than usual
- No, expenditures were lower than usual
- Don't Know        If this response, jump to 63

**62. If lower or higher, please explain:**

**63. Now I would like to ask a few questions about your households' spending related to health in the last month. For each question, please exclude spending using vouchers for health.**

**In the past month, has your household spent money on health (including medical consultations, diagnostic tests, medications, and/or transportation to receive these)?**

Choose one response

- Yes
- No        If this response, jump to 73
- Don't Know        If this response, jump to 73

**64. In the past month, how much has your household spent on medical consultations (in LBP)? Do not include the cost of medicines.**

**If the answer is "I don't know", please insert number 999.**

**If there were no expenses, enter "0"**

**65. In the past month, how much has your household spent on medical diagnostic tests (in LBP)?**

**If the answer is "I don't know", please insert number 999.**

**If there were no expenses, enter 0**

**66. In the past month, how much has your household spent on medications (in LBP)?**

**If the answer is "I don't know", please insert number 999.**

**If there were no expenses, enter 0**

**67. In the past month, how much has your household spent on transportation to receive medical care, diagnostic tests, or prescribed medication (in LBP)?**

**If the answer is "I don't know", please insert number 999.**

**If there were no expenses, enter 0**

**68. Were your household's expenditures on health in the past month similar to your usual expenditure levels?**

Choose one response

- Yes        If this response, jump to 71
- No, expenditures were higher than usual
- No, expenditures were lower than usual

- Don't Know      If this response, jump to 71

**69. If lower or higher, please explain:**

**70. How much does your household spend on health in a usual month (including medical consultations, diagnostic tests, medications, and/or transportation to receive these)?**

Enter '999' for don't know

**71. In the past month, did any organization give you money, either before or after the health expenses were incurred, that was intended to help cover medical costs?**

Choose one response

- Yes
- No      If this response, jump to 73
- Don't Know      If this response, jump to 73

**72. How much money did they provide (in LBP)?**

**73. Please estimate your household's total income in the last month (in LBP). This may include income from a variety of sources such as salaries, pensions, investments or remittances. Do not include cash or vouchers received as humanitarian assistance.**

**74. How many household members worked in the last month?**

**75. From which type of employment is the households' largest income source?**

Choose one response

- Agriculture
- Construction
- Manufacturing
- Hotel/restaurant/sales
- Domestic service job
- Professional/salaried position
- Self-employment
- Transportation (eg: taxi driver)
- Doorman / building keeper
- Other

**76. How much income came from this source in the last month (in LBP)?**

**77. Is this full-time or part-time employment?**

Choose one response

- Full time
- Part time

**78. Is this income regular?**

Choose one response

- Regular (consistent/stable income)
- Irregular (varies daily/weekly)
- Seasonal (varies monthly/seasonally)

**79. Did the household have employment income from any other sources?**

Choose one response

- Yes

- No      If this response, jump to 86

**80. From which type of employment is the households' second largest income source?**

Choose one response

- Agriculture
- Construction
- Manufacturing
- Hotel/restaurant/sales
- Domestic service job
- Professional/salaried position
- Self-employment
- Transportation (eg: taxi driver)
- Doorman / building keeper
- Other

**81. How much income came from this source in the last month (in LBP)?**

**82. Is this full-time or part-time employment?**

Choose one response

- Full time
- Part time

**83. Is this income regular?**

Choose one response

- Regular (consistent/stable income)
- Irregular (varies daily/weekly)
- Seasonal (varies monthly/seasonally)

**84. Did the household have employment income from any other sources?**

Choose one response

- Yes
- No      If this response, jump to 86

**85. From which other types of employment did the household earn income?**

Choose all that apply

- Agriculture
- Construction
- Manufacturing
- Hotel/restaurant/sales
- Domestic service job
- Professional/salaried position
- Self-employment
- Transportation (eg: taxi driver)
- Doorman / building keeper
- Other

**86. In the last month, did your household obtain income from any of the following sources?**

If yes, enter monthly amount in LBP (total). If no, enter "0"

**87. Profit from rental property you own (in Syria or elsewhere)**

**88. Remittances from family (abroad or employed elsewhere)**

**89. Gift from family/friend/other person**

**90. Loan**

**91. Asset Sales**

**92. Other**

**Enter the amount of income received from other sources.**

**93. Specify other income**

**94. SECTION 5: RECEIPT OF HUMANITARIAN ASSISTANCE**

**95. Since arriving to Lebanon, have you received regular monthly cash transfers from UNHCR? This is a regular transfer of the same amount provided every month to help households meet basic needs. Do not include intermittent transfers such as those provided in only in winter.**

**If yes, for how many years?**

**INTERVIEWER: If the household has come off and on UNHCR cash transfers, ask them to estimate each time period separately and then combine them to find the total length of time receiving UNHCR cash transfers. Only include cash transfers from UNHCR.**

**Choose one response**

- Never received UNHCR assistance    If this response, jump to 115
- < 6 months
- 6 months to < 1 year
- 1 year to < 2 years
- 2 years to < 3 years
- 3 or more years

**96. Does your household currently receive monthly cash assistance from UNHCR?**

**Choose one response**

- Yes
- No        If this response, jump to 115
- Don't Know        If this response, jump to 115

**97. If yes, which case registration number(s) receive monthly cash assistance from UNHCR?**

**Enter case registration numbers, separating each with a comma (i.e. case#1,case#2,case#3....)**

**98. How much money did your household receive from UNHCR last month (in LBP)?**

**99. READ ALOUD: Now I would like to ask you about the use of UNHCR cash transfers. For each category that I read, please tell if you spend UNHCR cash on it or not. If yes, please tell me the expenditure amount for the last month. (in LBP; Record 0 for none, 999 for don't know)**

**100. Housing / rent**

**101. Electricity or generator**

**102. Gas / Fuel / Wood (for cooking and heating only)**

**103. Water**

**104. Consumable household items (toilet paper, soap, etc. Does not include larger purchases such as furniture)**

**105. Telecommunication, internet, mobile subscription**

**106. Food**

**107. Transportation**

**108. Medicines**

**109. Health care (consultation fees, diagnostic testing)**

**110. Education (include transportation and supplies)**

**111. Clothes**

**112. Payment of debt**

**113. Anything else?**

Enter the amount of UNHCR cash transfers spent on other items.

**114. Specify other cash spending**

**115. Since arriving to Lebanon, have you received regular monthly assistance from the World Food Programme?**

**If yes, for how many years?**

**INTERVIEWER:** If the household has come off and on WFP assistance, ask them to estimate each time period separately and then combine them to find the total length of time receiving WFP assistance. Only include assistance from WFP.

Choose one response

- Never received      If this response, jump to 119

- < 6 months

- 6 months to < 1 year

- 1 year to < 2 years

- 2 years to < 3 years

- 3 or more years

**116. Does your household currently receive monthly cash or voucher assistance from the World Food Programme?**

Choose one response

- Yes

- No      If this response, jump to 119

- Don't Know      If this response, jump to 119

**117. How much money did your household receive from WFP last month (in LBP)?**

**118. Is the assistance provided as a store credit or cash collected at an ATM?**

Choose one response

- E-card

- Cash transfer

**119. Since arriving to Lebanon, have you received regular monthly cash or voucher assistance from any other organization?**

Include only cash transfers that are provided on a monthly basis for the same amount.

**If yes, for how many years? If multiple sources, record the longest.**

**INTERVIEWER: If the household has come off and on other cash/voucher assistance, ask them to estimate each time period separately and then combine them to find the total length of time receiving other cash/voucher assistance.**

Choose one response

- Never received      If this response, jump to 124
- < 6 months
- 6 months to < 1 year
- 1 year to < 2 years
- 2 years to < 3 years
- 3 or more years

**120. Does your household currently receive regular monthly cash or voucher assistance from any other organization? Include only cash transfers that are provided on a monthly basis for the same amount.**

Choose one response

- Yes
- No      If this response, jump to 124
- Don't Know      If this response, jump to 124

**121. Which organization(s) provides assistance?**

**122. Is the assistance unrestricted or is it intended to be used for certain types of expenses only? Include only transfers that are provided on a monthly basis for the same amount.**

Choose all that apply

- Unrestricted cash
- Cash for rent
- Voucher for rent
- Cash for education
- Cash for shelter
- Cash for health
- Other cash (specify)

**123. In total, how much did your household receive in cash/voucher assistance last month from all sources other than UNHCR and WFP (LBP)?**

**124. Has your household received any other type of cash or voucher assistance in the past 3 months?**

**Include any cash/voucher assistance that was received from humanitarian organizations on an irregular basis (most often a single transfer). For example, cash for child birth or winterization.**

Choose one response

- Yes
- No      If this response, jump to 128
- Don't Know      If this response, jump to 128

**125. From which organization(s)?**

**126. How much cash/voucher assistance was received, in total, from all organizations, in the past 3 months (in LBP)? Enter the combine amount from all sources. If necessary, help the respondent by listing transfers from each source separately; then record the total.**

**127. What was the assistance provided for?**

**128. Did your household receive any in-kind assistance in the past 3 months?**

Choose one response

- Yes
- No      If this response, jump to 131
- Don't Know      If this response, jump to 131

**129. What type(s) of assistance were received?**

Choose all that apply

- Accommodation
- Shelter materials/repairs
- Utilities (fuel, electricity, water)
- Household items / Clothing
- Food
- Medication
- Health services
- Education
- Business/livelihood inputs
- Other (specify)

**130. Provide description for "other". Leave blank if "other" was not selected in previous question.**

**131. SECTION 6: ASSET SALES AND BORROWING**

**132. In the past 3 months, have you had to sell any assets in order to pay for routine household expenses?**

Choose one response

- Yes
- No      If this response, jump to 139
- Don't Know      If this response, jump to 139

**133. What types of assets did you sell?**

Choose all that apply

- Jewelry or gold
- Household assets (appliances, electronics, etc.)
- Vehicle (car, motorcycle)
- Property (land, house)
- Productive assets (personal or business items used for income generation)
- Other

**134. How much money did your household earn from asset sales in the past 3 months (in LBP)?**

**135. What did you use the majority of money from asset sales for?**

**If money was spent on multiple categories, record the category where most of the money was spent.**

Choose one response

- Rent      If this response, jump to 137
- Food      If this response, jump to 137
- Medication      If this response, jump to 137
- Health service      If this response, jump to 137
- Education      If this response, jump to 137
- Business/livelihood      If this response, jump to 137
- Shelter repairs      If this response, jump to 137
- Utilities (fuel, electricity, water)      If this response, jump to 137
- Household items / Clothing      If this response, jump to 137
- Other (specify)

**136. Provide description for "other"**

**137. Did you spend money from asset sales on anything else?**

Choose all that apply

- No
- Rent
- Food
- Medication
- Health service
- Education
- Business/livelihood
- Shelter repairs
- Utilities (fuel, electricity, water)
- Household items / Clothing
- Other (specify)

**138. Provide description for "other". Leave blank if "other" was not selected in previous question.**

**139. In the past 3 months, have you had to borrow any money in order to pay for routine household expenses?**

Choose one response

- Yes
- No      If this response, jump to 146
- Don't Know      If this response, jump to 146

**140. From whom have you borrowed? (Note: if borrowing from more than one source, select the source from which the most was borrowed)**

Choose all that apply

- Family
- Friends
- Informal lender
- Microfinance organization
- Bank
- Shawish
- Store (bought food on credit)
- Local associations/charity (for example, a mosque)
- Landlord
- Stranger
- Other      ٤

**141. How much money did your household borrow in the past 3 months (in LBP)?**

**If necessary, help the respondent by listing the amount borrowed from each source separately; then record the total.**

**142. What did you use the majority of borrowed money for?**

**If money was spent on multiple categories, record the category where most of the money was spent.**

Choose one response

- Rent      If this response, jump to 144
- Food      If this response, jump to 144
- Medication      If this response, jump to 144
- Health service      If this response, jump to 144
- Education      If this response, jump to 144
- Business/livelihood      If this response, jump to 144
- Shelter repairs      If this response, jump to 144

- Utilities (fuel, electricity, water)      If this response, jump to 144
- Household items / Clothing      If this response, jump to 144
- Other (specify)

**143. Provide description for "other"**

**144. Did you spend borrowed money on anything else?**

Choose all that apply

- No
- Rent
- Food
- Medication
- Health service
- Education
- Business/livelihood
- Shelter repairs
- Utilities (fuel, electricity, water)
- Household items / Clothing
- Other (specify)

**145. Provide description for "other". Leave blank if "other" was not selected in previous question.**

**146. How much money is currently owed by your household (in LBP)? Include money borrowed within the past 3 months in addition to any other outstanding debt.**

**147. SECTION 7: CHILD HEALTH CARE SEEKING**

**Read aloud:** Now I would like to ask some questions about the last time a child (under 18 years old) in your household needed health care.

**148. DO NOT READ ALOUD: Is there anyone under 18 years of age in this household?**

Choose one response

- Yes
- No      If this response, jump to 216

**149. When was the last time a CHILD (under 18 years old) in your household had a health problem that you felt needed medical care?      Only include health problems that occurred while in Lebanon, even if you did not take the child to a doctor, pharmacy or other medical provider.**

**INTERVIEWER:** If more than two children were sick at the same time as the caregiver which child was the sickest and answer the following set of questions only for the sickest child.

Choose one response

- Less than two weeks ago
- Between 2 weeks and less than 1 month ago
- Between 1 month and less than 3 months ago
- Between 3 months and less than 6 months ago
- Between 6 months and less than 1 year ago
- More than 1 year ago      If this response, jump to 216
- Never needed care in Lebanon      If this response, jump to 216
- Don't know      If this response, jump to 216

**150. How old is this child currently?**

**NOTE:** record age in years. If the child is 0-11 months old, you should write "0". If the child is 12-23 months old, you should write "1". If the child is 24-35 months old, you should write "2". etc.

**151. Child sex**

Choose one response

- Male
- Female

**152. Which reason best describes why health care was needed? (if more than one, record the most concerning)**

Choose one response

- Fever If this response, jump to 154
- Diarrhea If this response, jump to 154
- Respiratory problem such as cough, cold, flu or difficulty breathing (not chronic) If this response, jump to 154
- Asthma If this response, jump to 154
- Injury If this response, jump to 154
- Dental care If this response, jump to 154
- Behavioral or emotional problem If this response, jump to 154
- Eye problem If this response, jump to 154
- Ear problem If this response, jump to 154
- Skin problem If this response, jump to 154
- Worms If this response, jump to 154
- Other (specify)

**153. Provide description for "other"**

**154. Did the child receive medical attention for the condition?**

Choose one response

- Yes, sought and received
- No, did not seek care If this response, jump to 214
- No, sought but no care received If this response, jump to 214
- Don't Know If this response, jump to 216

**155. Where did (child's name) first seek care for the condition?**

Choose one response

- Primary health center
- Private clinic
- Home based provider (Syrian)
- Home based provider (Lebanese)
- Hospital
- Mobile Medical Unit (MMU)
- Pharmacy
- Home visit (provider consulted in the respondent's home)
- Other

**156. What was the reason for choosing to seek care from that provider? (Record primary reason)**

Choose one response

- Free consultation services
- Low cost consultation services
- Closest to place of residence
- No other facility nearby
- Like staff/quality/family doctor
- Free or reduced cost medications provided
- Free or reduced diagnostic tests provided
- Availability of needed services

- Medical emergency
- Short waiting time / easy to get an appointment
- Not sick enough to take to health facility
- Did not know any other providers
- Other (specify)

**157. Provide description for other. Leave blank if other was not selected in the previous question.**

**158. What type of hospital was used?**

Choose one response

- Private hospital
- Public hospital
- Don't know

**159. What type of visit was this?**

Choose one response

- Emergency room visit (where people receive urgent care when they are very ill) If this response, jump to 166
- Outpatient visit If this response, jump to 166
- Inpatient admission (when you are given a bed at the hospital and stay overnight or longer)

**160. How many nights was the hospital stay?**

**161. Did UNHCR or any other organization assist in paying for some of the fees?**

Choose one response

- Yes, UNHCR
- Yes, other organization
- Yes, both
- No, none
- Don't Know

**162. Did you/your household have to pay for any of the cost yourself?**

Choose one response

- Yes
- No If this response, jump to 166
- Don't Know If this response, jump to 166

**163. How much did your household pay for the hospital visit (in LBP, excluding the amount paid by any organization on your behalf)?**

**164. Did you pay for the hospital visit on credit?**

Choose one response

- Yes
- No If this response, jump to 166

**165. How much is still owed (in LBP)?**

**166. Were any medicines prescribed at this visit?**

Choose one response

- Yes, provided at the health facility If this response, jump to 168
- Yes, but purchased at another location
- Yes, medicine prescribed but not obtained
- No medicine prescribed If this response, jump to 168

**167. Why were you not able to get the medicines that were prescribed? (Record the primary reason)**

Choose one response

- Medication was out of stock at the facility
- Medication was not available at the facility
- Medication was too expensive
- Other

**168. Did your household have to pay for the visit?**

**Payment may include consultation fees for the provider, diagnostic testing, medicines, or transportation to get to/from the facility.**

Choose one response

- Yes
- No      If this response, jump to 176
- Don't Know      If this response, jump to 176

**169. What was the total amount that your household paid at the facility (LBP)?**

**170. How much money did your household pay to the provider for consultation fees (LBP)?**

**171. How much money did your household pay for diagnostic testing (LBP)?**

**172. How much money did your household pay for medicines (at the facility, do not include medicines purchased elsewhere; in LBP)?**

**173. Of the medicines you obtained at the health facility, did you get any on credit?**

Choose one response

- Yes
- No      If this response, jump to 175

**174. How much is still owed (in LBP)?**

**175. How much money did your household pay for transportation to/from the facility (in LBP)?**

**176. Were there any diagnostic tests, treatments, or medicines that were recommended but that you could not afford?**

Choose one response

- Yes
- No      If this response, jump to 179

**177. What was recommended that you could not afford?**

Choose all that apply

- Diagnostic tests
- Medication
- Specialist Consultation
- Medical Equipment
- Other

**178. What was the total cost of recommended tests/treatments/medicines that were not obtained because of cost (in LBP)?**

**179. Was (name) referred to another facility or provider for care?**

Choose one response

- Yes, received referral care
- Yes, but did not receive referral care
- No                      If this response, jump to 203
- Don't Know              If this response, jump to 203

**180. What was (name) referred for?**

**Record primary reason if multiple reasons are provided.**

Choose one response

- Diagnostic or laboratory test
- Specialist consultation
- Curative intervention (specific medication, surgery, procedure)
- Other

**181. Where was the child referred?**

Choose one response

- Mobile Medical Unit (MMU)              If this response, jump to 183
- Primary health center              If this response, jump to 183
- Private clinic              If this response, jump to 183
- Medical center              If this response, jump to 183
- Hospital
- Other              If this response, jump to 183

**182. What type of hospital was used?**

Choose one response

- Private hospital
- Public hospital
- Don't know

**183. What type of visit was this?**

Choose one response

- Emergency room visit (where people receive urgent care when they are very ill)              If this response, jump to 190
- Outpatient visit              If this response, jump to 190
- Inpatient admission (when you are given a bed at the hospital and stay overnight or longer)

**184. How many nights was the hospital stay?**

**185. Did UNHCR or any other organization assist in paying for some of the fees?**

Choose one response

- Yes, UNHCR
- Yes, other organization
- Yes, both
- No, none
- Don't Know

**186. Did you/your household have to pay for any of the cost yourself?**

Choose one response

- Yes
- No              If this response, jump to 190
- Don't Know              If this response, jump to 190

**187. How much did your household pay for the hospital visit (in LBP, excluding the amount paid by any organization on your behalf)?**

**188. Did you pay for the hospital visit on credit?**

Choose one response

- Yes
- No            If this response, jump to 190

**189. How much is still owed (in LBP)?**

**190. Were any medicines prescribed at the referral visit?**

Choose one response

- Yes, provided at the health facility            If this response, jump to 192
- Yes, but purchased at another location
- Yes, medicine prescribed but not obtained
- No medicine prescribed            If this response, jump to 192

**191. Why were you not able to get the medicines that were prescribed? (Record the primary reason)**

Choose one response

- Medication was out of stock at the referral facility
- Medication was not available at the referral facility
- Medication was too expensive
- Other

**192. Did your household have to pay for the referral provider visit?**

**Payment may include consultation fees for the provider, diagnostic testing, medicines, or transportation to get to/from the facility.**

Choose one response

- Yes
- No            If this response, jump to 200
- Don't Know            If this response, jump to 200

**193. What was the total amount that your household paid at the referral facility (LBP)?**

**194. How much money did your household pay to the referral provider for consultation fees (LBP)?**

**195. How much money did your household pay at the referral facility for diagnostic testing (LBP)?**

**196. How much money did your household pay for medicines at the referral facility (do not include medicines purchased elsewhere; in LBP)?**

**197. Of the medicines you obtained at the referral facility, did you get any on credit?**

Choose one response

- Yes
- No            If this response, jump to 199

**198. How much is still owed (in LBP)?**

**199. How much money did your household pay for transportation to/from the referral facility (in LBP)?**

**200. Were there any diagnostic tests, treatments, or medicines that were recommended at the referral facility but that you could not afford?**

Choose one response

- Yes

- No      If this response, jump to 203

**201. What was recommended that you could not afford?**

Choose all that apply

- Diagnostic tests
- Medication
- Specialist Consultation
- Medical Equipment
- Other

**202. What was the total cost of recommended tests/treatments/medicines that were not obtained because of cost (in LBP)?**

**203. Were any medications prescribed for the child's illness that were not obtained at the facilities where you received care?**

Choose one response

- Yes
- No      If this response, jump to 216

**204. Did you attempt to obtain these medications elsewhere?**

Choose one response

- Yes
- No      If this response, jump to 208

**205. Where did you attempt to obtain the prescribed medications?**

Choose all that apply

- At another facility (different from where the doctor was seen)
- Private pharmacy
- Syria
- Via a local contact/fixer
- Other

**206. Provide description for "other". Leave blank if "other" was not selected in previous question.**

**207. Were you able to get all of the medications that were prescribed?**

Choose one response

- Yes, all of the medications      If this response, jump to 210
- Yes, some of the medications
- No
- Don't Know      If this response, jump to 216

**208. Why were you not able to get all of the medicines that were prescribed? (Record the primary reason)**

Choose one response

- Household could not afford the medication
- Did not know where to get the medication
- Medication was out of stock at the facility
- Medication was out of stock at private pharmacy
- Symptoms improved/child began to feel better
- Household chose a different treatment
- Household decided the medicines were not needed
- Purchasing medication was not a priority
- Too far to travel to obtain medication

- Other (specify)

**209. Provide description for "other". Leave blank if "other" was not selected in previous question.**

**210. Did your household have to pay for the medications received outside the facilities where you received care?**

Choose one response

- Yes

- No      If this response, jump to 216

**211. How much money did your household pay for medicines outside the facility where you received care (do not include medicines purchased at the care facility; in LBP)?**

**212. Of the medicines you obtained outside the health facilities where care was received, did you get any on credit?**

Choose one response

- Yes

- No      If this response, jump to 216

**213. How much is still owed (in LBP)?**

**214. What was the main reason for not seeking medical care for the child's health condition? (Record one, Primary reason)**

Choose one response

- Could not afford provider costs      If this response, jump to 216

- Distance or lack of transportation      If this response, jump to 216

- Could not afford transportation costs      If this response, jump to 216

- Provider's equipment or drugs are inadequate      If this response, jump to 216

- Disliked previous visit(s) (attitude)      If this response, jump to 216

- Disliked previous visit(s) (long waiting time)      If this response, jump to 216

- Disliked previous visit(s) (quality of care)      If this response, jump to 216

- Could not take time off work or had other commitments      If this response, jump to 216

- Didn't know where to go      If this response, jump to 216

- Family decided care should not be sought (no male permission)      If this response, jump to 216

- Security concerns and/or check points      If this response, jump to 216

- Appointment scheduled / still waiting      If this response, jump to 216

- Other (specify)

**215. Provide description for "other"**

## **216. SECTION 8: HEALTH CARE SEEKING FOR CHRONIC CONDITIONS**

Now I am going to ask some questions about chronic health conditions in your household. Chronic health conditions are those which last for long periods of time, often many years, and may never be cured. Examples of chronic conditions include hypertension or high blood pressure, diabetes, heart problems and long term respiratory diseases, although there are many others. Include only adults 18 years and older.

**217. How many of your household members have been diagnosed with a chronic health condition such as diabetes or hypertension?**

**218. I would like to ask some questions about each person in your household that has been diagnosed with a chronic health condition.**

Subform name : H3SD\_R2HC\_MPC\_Enrollment\_Lebanon\_NCDSUB\_v3

Subform keyword : NCD

## **219. SECTION 9: ACUTE ILLNESS**

**Read aloud:** Now I would like to ask some questions about the last time an adult (over 18 years old) in your household needed health care for an acute illness.

**220. When was the last time an adult (over 18 years old) in your household been acutely ill with a health problem where they needed medical care? Include health problems that occurred, even if the individual did not receive medical care from a doctor, pharmacy, or other medical provider. Do not include chronic medical conditions.**

**INTERVIEWER:** If more than two acute illness occurred within the past month, ask the respondent which was most severe and answer questions only for that occurrence.

Choose one response

- Less than two weeks ago
- Between 2 weeks and less than 1 month ago
- Between 1 month and less than 3 months ago
- Between 3 months and less than 6 months ago
- Between 6 months and less than 1 year ago
- More than 1 year ago    If this response, jump to 287
- Never needed care in Lebanon    If this response, jump to 287
- Don't know    If this response, jump to 287

**221. How old is (name) currently (in years)?**

**222. (Name)'s sex**

Choose one response

- Male
- Female

**223. Which reason best describes why health care was needed? (if more than one, record the most concerning)**

Choose one response

- Injury    If this response, jump to 225
- Infection or communicable disease (including cough, cold, flu, and diarrhoea)    If this response, jump to 225
- Dental Care    If this response, jump to 225
- Skin problem    If this response, jump to 225
- Emotional or mental health    If this response, jump to 225
- Complications related to pregnancy    If this response, jump to 225
- Gynecological problem    If this response, jump to 225
- Asthma/breathing difficulty    If this response, jump to 225
- Other (specify)

**224. Provide description for "other"**

**225. Was medical attention received for the condition?**

Choose one response

- Yes, sought and received
- No, did not seek care    If this response, jump to 285
- No, sought but no care received    If this response, jump to 285
- Don't Know    If this response, jump to 287

**226. Where did (name) first seek care for the condition?**

Choose one response

- Primary health center
- Private clinic
- Home based provider (Syrian)

- Home based provider (Lebanese)
- Hospital
- Mobile Medical Unit (MMU)
- Pharmacy
- Home visit (provider consulted in the respondent's home)
- Other

**227. What was the reason for choosing to seek care from that provider? (Record primary reason)**

Choose one response

- Free consultation services
- Low cost consultation services
- Closest to place of residence
- No other facility nearby
- Like staff/quality/family doctor
- Free or reduced cost medications provided
- Free or reduced diagnostic tests provided
- Availability of needed services
- Medical emergency
- Short waiting time / easy to get an appointment
- Not sick enough to take to health facility
- Did not know any other providers
- Other (specify)

**228. Provide description for other. Leave blank if other was not selected in the previous question.**

**229. What type of hospital was used?**

Choose one response

- Private hospital
- Public hospital
- Don't know

**230. What type of visit was this?**

Choose one response

- Emergency room visit (where people receive urgent care when they are very ill) If this response, jump to 237
- Outpatient visit If this response, jump to 237
- Inpatient admission (when you are given a bed at the hospital and stay overnight or longer)

**231. How many nights was the hospital stay?**

**232. Did UNHCR or any other organization assist in paying for some of the fees?**

Choose one response

- Yes, UNHCR
- Yes, other organization
- Yes, both
- No, none
- Don't Know

**233. Did you/your household have to pay for any of the cost yourself?**

Choose one response

- Yes
- No If this response, jump to 237
- Don't Know If this response, jump to 237

**234. How much did your household pay for the hospital visit (in LBP, excluding the amount paid by any organization on your behalf)?**

**235. Did you pay for the hospital visit on credit?**

Choose one response

- Yes
- No            If this response, jump to 237

**236. How much is still owed (in LBP)?**

**237. Were any medicines prescribed at this visit?**

Choose one response

- Yes, provided at the health facility            If this response, jump to 239
- Yes, but purchased at another location
- Yes, medicine prescribed but not obtained
- No medicine prescribed            If this response, jump to 239

**238. Why were you not able to get all of the prescribed medicines at the health facility? (Record the primary reason)**

Choose one response

- Medication was out of stock at the facility
- Medication was not available at the facility
- Medication was too expensive
- Other

**239. Did your household have to pay for the visit?**

**Payment may include consultation fees for the provider, diagnostic testing, medicines, or transportation to get to/from the facility.**

Choose one response

- Yes
- No            If this response, jump to 247
- Don't Know            If this response, jump to 247

**240. What was the total amount that your household paid at the facility (LBP)?**

**241. How much money did your household pay to the provider for consultation fees (LBP)?**

**242. How much money did your household pay for diagnostic testing (LBP)?**

**243. How much money did your household pay for medicines (at the facility, do not include medicines purchased elsewhere; in LBP)?**

**244. Of the medicines you obtained at the health facility, did you get any on credit?**

Choose one response

- Yes
- No            If this response, jump to 246

**245. How much is still owed (in LBP)?**

**246. How much money did your household pay for transportation to/from the facility (in LBP)?**

**247. Were there any diagnostic tests, treatments, or medicines that were recommended but that you could not**

**afford?**

Choose one response

- Yes
- No      If this response, jump to 250

**248. What was recommended that you could not afford?**

Choose all that apply

- Diagnostic tests
- Medication
- Specialist Consultation
- Medical Equipment
- Other

**249. What was the total cost of recommended tests/treatments/medicines that were not obtained because of cost (in LBP)?**

**250. Was (name) referred to another facility or provider for care?**

Choose one response

- Yes, received referral care
- Yes, but did not receive referral care
- No      If this response, jump to 274
- Don't Know      If this response, jump to 274

**251. What was (name) referred for?**

**Record primary reason if multiple reasons are provided.**

Choose one response

- Diagnostic or laboratory test
- Specialist consultation
- Curative intervention (specific medication, surgery, procedure)
- Other

**252. Where was (name) referred?**

Choose one response

- Mobile Medical Unit (MMU)      If this response, jump to 254
- Primary health center      If this response, jump to 254
- Private clinic      If this response, jump to 254
- Medical center      If this response, jump to 254
- Hospital
- Other      If this response, jump to 254

**253. What type of hospital was used?**

Choose one response

- Private hospital
- Public hospital
- Don't know

**254. What type of visit was this?**

Choose one response

- Emergency room visit (where people receive urgent care when they are very ill)      If this response, jump to 261
- Outpatient visit      If this response, jump to 261
- Inpatient admission (when you are given a bed at the hospital and stay overnight or longer)

**255. How many nights was the hospital stay?**

**256. Did UNHCR or any other organization assist in paying for some of the fees?**

Choose one response

- Yes, UNHCR
- Yes, other organization
- Yes, both
- No, none
- Don't Know

**257. Did you/your household have to pay for any of the cost yourself?**

Choose one response

- Yes
- No                      If this response, jump to 261
- Don't Know              If this response, jump to 261

**258. How much did your household pay for the hospital visit (in LBP, excluding the amount paid by any organization on your behalf)?**

**259. Did you pay for the hospital visit on credit?**

Choose one response

- Yes
- No                      If this response, jump to 261

**260. How much is still owed (in LBP)?**

**261. Were any medicines prescribed at the referral visit?**

Choose one response

- Yes, provided at the health facility              If this response, jump to 263
- Yes, but purchased at another location
- Yes, medicine prescribed but not obtained
- No medicine prescribed                      If this response, jump to 263

**262. Why were you not able to get all of the prescribed medicines at the referral facility? (Record the primary reason)**

Choose one response

- Medication was out of stock at the referral facility
- Medication was not available at the referral facility
- Medication was too expensive
- Other

**263. Did your household have to pay for the referral provider visit?**

**Payment may include consultation fees for the provider, diagnostic testing, medicines, or transportation to get to/from the facility.**

Choose one response

- Yes
- No                      If this response, jump to 271
- Don't Know              If this response, jump to 271

**264. What was the total amount that your household paid at the referral facility (LBP)?**

**265. How much money did your household pay to the referral provider for consultation fees (LBP)?**

**266. How much money did your household pay at the referral facility for diagnostic testing (LBP)?**

**267. How much money did your household pay for medicines at the referral facility (do not include medicines purchased elsewhere; in LBP)?**

**268. Of the medicines you obtained at the referral facility, did you get any on credit?**

Choose one response

- Yes
- No      If this response, jump to 270

**269. How much is still owed (in LBP)?**

**270. How much money did your household pay for transportation to/from the facility (in LBP)?**

**271. Were there any diagnostic tests, treatments, or medicines that were recommended at the referral facility but that you could not afford?**

Choose one response

- Yes
- No      If this response, jump to 274

**272. What was recommended that you could not afford?**

Choose all that apply

- Diagnostic tests
- Medication
- Specialist Consultation
- Medical Equipment
- Other

**273. What was the total cost of recommended tests/treatments/medicines that were not obtained because of cost (in LBP)?**

**274. Were any medications prescribed for (name)'s illness that were not obtained at the facilities where care was received?**

Choose one response

- Yes
- No      If this response, jump to 287

**275. Did you attempt to obtain these medications elsewhere?**

Choose one response

- Yes
- No      If this response, jump to 279

**276. Where did you attempt to obtain the prescribed medications?**

Choose all that apply

- At another facility (different from where the doctor was seen)
- Private pharmacy
- Syria
- Via a local contact/fixer
- Other

**277. Provide description for "other". Leave blank if "other" was not selected in previous question.**

**278. Were you able to get all of the medications that were prescribed?**

Choose one response

- Yes, all of the medications      If this response, jump to 281
- Yes, some of the medications
- No
- Don't Know      If this response, jump to 287

**279. Why were you not able to get all of the medicines that were prescribed? (Record the primary reason)**

Choose one response

- Household could not afford the medication
- Did not know where to get the medication
- Medication was out of stock at the facility
- Medication was out of stock at private pharmacy
- Symptoms improved/(name) began to feel better
- Household chose a different treatment
- Household decided the medicines were not needed
- Purchasing medication was not a priority
- Too far to travel to obtain medication
- Other (specify)

**280. Provide description for "other". Leave blank if "other" was not selected in previous question.**

**281. Did your household have to pay for the medications received outside the facilities where you received care?**

Choose one response

- Yes
- No      If this response, jump to 287

**282. How much money did your household pay for medicines outside the facility where you received care (do not include medicines purchased at the care facility; in LBP/JD)?**

**283. Of the medicines you obtained outside the health facilities where care was received, did you get any on credit?**

Choose one response

- Yes
- No      If this response, jump to 287

**284. How much is still owed (in LBP)?**

**285. What was the main reason for not seeking medical care for the health condition? (Record one, primary reason)**

Choose one response

- Could not afford provider costs      If this response, jump to 287
- Distance or lack of transportation      If this response, jump to 287
- Could not afford transportation costs      If this response, jump to 287
- Provider's equipment or drugs are inadequate      If this response, jump to 287
- Disliked previous visit(s) (attitude)      If this response, jump to 287
- Disliked previous visit(s) (long waiting time)      If this response, jump to 287
- Disliked previous visit(s) (quality of care)      If this response, jump to 287
- Could not take time off work or had other commitments      If this response, jump to 287
- Didn't know where to go      If this response, jump to 287
- Family decided care should not be sought (no male permission)      If this response, jump to 287
- Security concerns and/or check points      If this response, jump to 287
- Appointment scheduled / still waiting      If this response, jump to 287

- Other (specify)

**286. Provide description for "other"**

**287. SECTION 10: SEXUAL AND REPRODUCTIVE HEALTH**

**288. Are any women in the household currently pregnant or have they given birth in the past six months?**

Choose one response

- No If this response, jump to 302
- Currently pregnant If this response, jump to 289
- Recently gave birth If this response, jump to 290
- Miscarriage If this response, jump to 302

**289. When do you expect the baby to be born?**

**290. Month of birth**

Choose one response

- January
- February
- March
- April
- May
- June
- July
- August
- September
- October
- November
- December

**291. Year of Birth**

Choose one response

- 2017
- 2018
- 2019

**292. In what type of facility did [name] deliver the baby?**

Choose one response

- Public hospital
- Private hospital or clinic
- Home
- Other

**293. What was the type of delivery?**

Choose one response

- Vaginal Normal
- Caesarean section
- Don't Know

**294. Did [name] have to pay anything herself for this delivery?**

Choose one response

- Yes

- No      If this response, jump to 296

**295. Approximately how much did they pay (in LBP)?**

**296. Did [name] receive any financial support from UNHCR or an NGO to help pay for the delivery costs?**

Choose one response

- Yes

- No      If this response, jump to 300

**297. Was this a payment to the health facility or a cash transfer or reimbursement to [name] directly?**

Choose one response

- Health facility      If this response, jump to 300

- Individual cash transfer      If this response, jump to 299

- Other (specify)

**298. Provide description for "other"**

**299. How much was the transfer/reimbursement (in LBP)?**

**300. Did you know that UNHCR provides support for delivery at hospital?**

Choose one response

- Yes

- No      If this response, jump to 302

**301. Did you know how to access this support?**

Choose one response

- Yes

- No

**302. SECTION 11: HOUSEHOLD HEALTH CARE ACCESS PERCEPTIONS**

**I am going to read you five statements about access to medical care.      Please tell me if you agree or disagree with each statement.**

**303. My household is able to get medical care whenever we need it.**

Choose one response

- Strongly agree

- Somewhat agree

- Somewhat disagree

- Strongly disagree

- Non applicable or no opinion

**304. My household has access to the medical specialists we need.**

Choose one response

- Strongly agree

- Somewhat agree

- Somewhat disagree

- Strongly disagree

- Non applicable or no opinion

**305. My household can always afford medical care.**

Choose one response

- Strongly agree

- Somewhat agree
- Somewhat disagree
- Strongly disagree
- Non applicable or no opinion

**306. My household can always afford the medications we need.**

Choose one response

- Strongly agree
- Somewhat agree
- Somewhat disagree
- Strongly disagree
- Non applicable or no opinion

**307. My household receives enough health information.**

Choose one response

- Strongly agree
- Somewhat agree
- Somewhat disagree
- Strongly disagree
- Non applicable or no opinion

**308. INTERVIEWER: This is the end of the questionnaire. Please thank the participant for their time.**

**309. Please write any additional comment about the interview that study coordinators need to know. If possible, please enter comment(s) in English.**

**310. Did you complete the full interview?**

Choose one response

- Yes
- No, but I have arranged to call the respondent back to complete the interview
- No, respondent refused to participate
- No, wrong phone number provided
- No, patient did not meet eligibility criteria

=====

**1. How old is (name) currently (in years)?**

**2. (Name)'s sex**

Choose one response

- Male
- Female

**3. What chronic medical conditions has (name) been diagnosed with?**

Choose all that apply

- Hypertension
- Diabetes
- Arthritis
- Chronic respiratory disease
- Cardiovascular disease
- Cancer
- Other (specify)

**4. Provide description for "other". Leave blank if "other" was not selected in previous question.**

**5. When was the last time that (name) saw a doctor for their chronic medical condition while in Lebanon?**

Choose one response

- Less than 1 month                      If this response, jump to 8
- Between 1 month and less than 3 months ago                      If this response, jump to 8
- Between 3 months and less than 6 months ago                      If this response, jump to 8
- Between 6 months and less than 1 year ago                      If this response, jump to 8
- More than 1 year ago                      If this response, jump to 54
- Never needed/sought care in Lebanon
- Don't Know                      If this response, jump to 54

**6. What was the main reason for not seeking medical care for (name)'s chronic condition? (Record one, Primary reason)**

Choose one response

- Could not afford provider costs                      If this response, jump to 54
- Distance or lack of transportation                      If this response, jump to 54
- Could not afford transportation costs                      If this response, jump to 54
- Provider's equipment or drugs are inadequate                      If this response, jump to 54
- Disliked previous visit(s) (attitude)                      If this response, jump to 54
- Disliked previous visit(s) (long waiting time)                      If this response, jump to 54
- Disliked previous visit(s) (quality of care)                      If this response, jump to 54
- Could not take time off work or had other commitments                      If this response, jump to 54
- Didn't know where to go                      If this response, jump to 54
- Family decided care should not be sought (no male permission)                      If this response, jump to 54
- Security concerns and/or check points                      If this response, jump to 54
- Appointment scheduled / still waiting                      If this response, jump to 54
- Not sick enough to go to health facility                      If this response, jump to 54
- Other (specify)

**7. Provide description for "other"**

**8. For the last time (name) needed care for chronic medical conditions in Lebanon, where did (name) first go?**

Choose one response

- Primary health center                      If this response, jump to 10
- Private clinic                      If this response, jump to 10
- Home based provider (Syrian)                      If this response, jump to 10
- Home based provider (Lebanese)                      If this response, jump to 10
- Hospital                      If this response, jump to 10
- Mobile Medical Unit (MMU)                      If this response, jump to 10
- Pharmacy                      If this response, jump to 10
- Home visit (provider consulted in the respondent's home)                      If this response, jump to 10
- Other (specify)

**9. Provide description for "other"**

**10. What was the reason for choosing to seek care from that provider? (Record primary reason)**

Choose one response

- Free consultation services
- Low cost consultation services
- Closest to place of residence
- No other facility nearby
- Like staff/quality/family doctor
- Free or reduced cost medications provided
- Free or reduced diagnostic tests provided
- Availability of needed services
- Medical emergency
- Short waiting time / easy to get an appointment
- Not sick enough to take to health facility
- Did not know any other providers
- Other (specify)

**11. Provide description for other. Leave blank if other was not selected in the previous question.**

**12. What type of hospital was used?**

Choose one response

- Private hospital
- Public hospital
- Don't know

**13. What type of visit was this?**

Choose one response

- Emergency room visit (where people receive urgent care when they are very ill    If this response, jump to 20
- Outpatient visit    If this response, jump to 20
- Inpatient admission (when you are given a bed at the hospital and stay overnight or longer)

**14. How many nights was the hospital stay?**

**15. Did UNHCR or any other organization assist in paying for some of the fees?**

Choose one response

- Yes, UNHCR
- Yes, other organization
- Yes, both

- No, none
- Don't Know

**16. Did you/your household have to pay for any of the cost yourself?**

Choose one response

- Yes
- No            If this response, jump to 27
- Don't Know        If this response, jump to 27

**17. How much did your household pay for the hospital visit (in LBP, excluding the amount paid by any organization on your behalf)?**

**18. Did you pay for the hospital visit on credit?**

Choose one response

- Yes
- No            If this response, jump to 27

**19. How much is still owed (in LBP)?**

**20. Did your household have to pay for the provider visit?**

Payment may include consultation fees for the provider, diagnostic testing, medicines, or transportation to get to/from the facility.

Choose one response

- Yes, paid some of the cost
- Yes, paid all of the cost        If this response, jump to 22
- No        If this response, jump to 27

**21. Who paid the other portion of the cost ?**

**22. What was the total amount that your household paid at the facility? (LBP) Do not include amounts that were paid on your behalf or reimbursed.**

**23. How much money did your household pay to the provider for consultation fees (in LBP)?**

**24. How much money did your household pay for diagnostic testing (LBP)?**

**25. How much money did your household pay for medicines (at the facility, do not include medicines purchased elsewhere; in LBP)?**

**26. How much money did your household pay for transportation to/from the facility (in LBP)?**

**27. Were there any diagnostic tests, treatments, or medicines that were recommended but that you could not afford?**

Choose one response

- Yes
- No            If this response, jump to 30

**28. What was recommended that you could not afford?**

Choose all that apply

- Diagnostic tests
- Medication
- Specialist Consultation
- Medical Equipment

- Other

**29. What was the total cost of recommended tests/treatments/medicines that were not obtained because of cost (in LBP)?**

**30. Was (name) referred to another facility or provider for care?**

Choose one response

- Yes, received referral care / نعم، تقى خدمات اتحوي
- Yes, but did not receive referral care
- No / لا If this response, jump to 50
- Don't Know If this response, jump to 50

**31. What was (name) referred for?**

Choose one response

- Lab tests / فحوصات مخبرية
- Diagnostic test / وسائ تشخيص
- Specialist Consultation
- Curative intervention (specific medication, surgery, procedure) / تدخ عاجي - أدوية ، جراحة، عاج مختص
- Other

**32. Where was (name) referred?**

Choose one response

- Mobile Medical Unit (MMU) If this response, jump to 34
- Primary health center If this response, jump to 34
- Private clinic If this response, jump to 34
- Medical center / مركز صحي If this response, jump to 34
- Hospital
- Other If this response, jump to 34

**33. What type of hospital was used?**

Choose one response

- Private hospital
- Public hospital
- Don't know

**34. What type of visit was this?**

Choose one response

- Emergency room visit (where people receive urgent care when they are very ill) / زيارة غرفة اطوارئ (اماكن اذي يتقى فيه (الأشخاص اراية اعاجه إذا كانوا شديدي امراض If this response, jump to 41
- Outpatient visit If this response, jump to 41
- Inpatient admission (when you are given a bed at the hospital and stay overnight or longer)

**35. How many nights was the hospital stay?**

**36. Did UNHCR or any other organization assist in paying for some of the fees?**

Choose one response

- Yes, UNHCR
- Yes, other organization
- Yes, both
- No, none
- Don't Know

**37. Did you/your household have to pay for any of the cost yourself?**

Choose one response

- Yes
- No                      If this response, jump to 47
- Don't Know                      If this response, jump to 47

**38. How much did your household pay for the hospital visit (in LBP, excluding the amount paid by any organization on your behalf)?**

**39. Did you pay for the hospital visit on credit?**

Choose one response

- Yes
- No                      If this response, jump to 47

**40. How much is still owed (in LBP)?**

**41. Did your household have to pay for the referral provider visit?**

**Payment may include consultation fees for the provider, diagnostic testing, medicines, or transportation to get to/from the facility.**

Choose one response

- Yes
- No                      If this response, jump to 47
- Don't Know                      If this response, jump to 47

**42. What was the total amount that your household paid at the referral facility (LBP)?**

**43. How much money did your household pay to the referral provider for consultation fees (in LBP)?**

**44. How much money did your household pay at the referral facility for diagnostic testing (in LBP)?**

**45. How much money did your household pay for medicines referral facility (do not include medicines purchased elsewhere; in LBP)?**

**46. How much money did your household pay for transportation to/from the facility (in LBP)?**

**47. Were there any diagnostic tests, treatments, or medicines that were recommended at the referral facility but that you could not afford?**

Choose one response

- Yes
- No                      If this response, jump to 50

**48. What was recommended that you could not afford?**

Choose all that apply

- Diagnostic tests
- Medication
- Specialist Consultation
- Medical Equipment /      امعدات/الأجهزة الطبية
- Other

**49. What was the total cost of recommended tests/treatments/medicines that were not obtained because of cost (in LBP)?**

**50. How many times has (name) visited a General Practitioner (GP) in the last 6 months?**

**51. How many times has (name) seen another doctor/specialist (not GP) in the last 6 months?**

**52. How many times has (name) consulted a pharmacist in the last 6 months?**

**53. How many visits to a hospital for chronic medical conditions has (name) had in the last 6 months?**

**54. Has (name) been prescribed, by a doctor/pharmacist, medicines for their chronic condition(s) (in Lebanon or in Syria)?**

Choose one response

- Yes, by a doctor in Syria
- Yes, by a pharmacist in Syria
- Yes, by a doctor in Lebanon
- Yes, by a pharmacist in Lebanon
- No      If this response, jump to 65

**55. How many medications is (name) currently prescribed for chronic conditions?**

**56. In the past month, how often has (name) taken the medications prescribed for chronic conditions?**

Choose one response

- Always / دائما
- Most of the time (>50% of doses taken as prescribed)
- Some of the time (<50% of doses taken as prescribed)
- Never (did not take medication in the past month)

**57. Does the household face difficulties obtaining medication prescribed for (name)?**

Choose one response

- Yes, very often
- Yes, sometimes
- Never      If this response, jump to 60

**58. What difficulties did you face in obtaining medication? (Record primary difficulty)**

Choose all that apply

- Medication was out of stock at the facility
- Household could not afford the medication
- Did not know where to get the medication
- Difficulty finding a pharmacy with my medication
- Too far to travel to obtain medication
- Did not like what was available
- Other (specify)

**59. Provide description for "other". Leave blank if "other" was not selected in previous question.**

**60. Where does (name) most often obtain medication?**

Choose one response

- At the facility where the doctor was seen      If this response, jump to 62
- At another facility (different from where the doctor was seen)      If this response, jump to 62
- Private pharmacy      If this response, jump to 62
- Syria      If this response, jump to 62
- Via a local contact/fixer      If this response, jump to 62
- Other (specify)

**61. Provide description for "other"**

**62. On average, how much does the household pay for (name)'s medications per month (in LBP)?**

**If medication received in longer supply, calculate average monthly price (i.e. for 3-month supply divide cost by 3).**

**63. Have you received any medicines for (name)'s condition on credit?**

Choose one response

- Yes

- No      If this response, jump to 65

**64. How much is still owed (in LBP)?**

**65. End of chronic condition questions for this individual**
