# Supplementary material for: Multi-purpose cash transfers and health among vulnerable Syrian refugees in Lebanon: a prospective cohort study
Source: BMC Public Health. 2021 Jun 19;21:1176. doi: 10.1186/s12889-021-11196-8 (PMC8214292; doi:10.1186/s12889-021-11196-8)
Supplement: Supplementary file 3 — Additional file 3. Health Care-Seeking and Medicines for Household Member Illness at Baseline and Endline. Description: Baseline and endline descriptive analyses of care-seeking outcomes by group. [file 12889_2021_11196_MOESM3_ESM.pdf]

### Health Care-Seeking and Medicines for Household Member Illness at Baseline and Endline

|                                                | BASELINE                         |                                      |            | ENDLINE                          |                                      |            |
|------------------------------------------------|----------------------------------|--------------------------------------|------------|----------------------------------|--------------------------------------|------------|
|                                                | MPC HHs<br>(N=168)<br>% (95% CI) | Control HHs<br>(N=375)<br>% (95% CI) | P<br>value | MPC HHs<br>(N=168)<br>% (95% CI) | Control HHs<br>(N=375)<br>% (95% CI) | P<br>value |
| <b>Most Recent Childhood Illness</b>           |                                  |                                      |            |                                  |                                      |            |
| <b>Access to Health Services and Medicines</b> |                                  |                                      |            |                                  |                                      |            |
| Sought and received medical care               | 98.4% (96.1,100%)                | 92.8% (89.8,95.8%)                   | 0.133      | 98.0% (95.8,100%)                | 91.6% (88.4,94.8%)                   | 0.062      |
| Able to obtain prescribed medications          | 99.2% (97.5,100%)                | 98.0% (96.3,99.8%)                   | 0.417      | 99.3% (98.0,100%)                | 97.7% (95.9,99.5%)                   | 0.230      |
| <b>Health Service Utilization</b>              |                                  |                                      |            |                                  |                                      |            |
| Outpatient visit                               | 83.6% (76.9,90.3%)               | 82.7% (78.1,87.2%)                   | 0.521      | 94.6% (90.9,98.3%)               | 88.2% (84.4,92.1%)                   | 0.101      |
| Emergency room visit                           | 13.9% (7.7,20.2%)                | 16.2% (11.8,20.7%)                   |            | 2.0% (0.3,4.3%)                  | 3.7% (1.4,5.9%)                      |            |
| Hospital admission                             | 2.5% (0.3,5.2%)                  | 1.1% (0.1,2.4%)                      |            | 3.4% (0.4,6.3%)                  | 8.1% (4.8,11.3%)                     |            |
| <b>Cost as Barrier to Health</b>               |                                  |                                      |            |                                  |                                      |            |
| Medical care not sought because of cost        | 100% --                          | 94.7% (83.7,100%)                    | 0.740      | 66.7% (76.8,210.1%)              | 83.3% (67.3,99.4%)                   | 0.484      |
| All needed care not received due to cost       | 6.6% (2.1,11.0%)                 | 10.3% (6.7,14.0%)                    | 0.230      | 45.9% (37.8,54.1%)               | 37.9% (32.1,43.7%)                   | 0.107      |
| <b>Most Recent Adult Acute Illness</b>         |                                  |                                      |            |                                  |                                      |            |
| <b>Access to Health Services and Medicines</b> |                                  |                                      |            |                                  |                                      |            |
| Sought and received medical care               | 88.3% (81.0,95.7%)               | 90.6% (86.2,95.1%)                   | 0.202      | 92.6% (87.8,97.3%)               | 85.4% (80.8,90.0%)                   | 0.064      |
| Able to obtain prescribed medications          | 100% --                          | 97.9% (95.5,100%)                    | 0.229      | 97.1% (93.9,100%)                | 98.9% (97.4,100%)                    | 0.261      |
| <b>Health Service Utilization</b>              |                                  |                                      |            |                                  |                                      |            |
| Outpatient visit                               | 86.8% (78.5,95.0%)               | 87.7% (82.5,93.0%)                   | 0.761      | 91.1% (85.7,96.4%)               | 94.3% (91.0,97.6%)                   | 0.549      |
| Emergency room visit                           | 13.2% (5.0,21.5%)                | 11.6% (6.5,16.7%)                    |            | 4.5% (0.6,8.3%)                  | 2.6% (0.3,4.9%)                      |            |
| Hospital admission                             | 0.0% --                          | 0.6% (0.6,1.9%)                      |            | 4.5% (0.6,8.3%)                  | 3.1% (0.6,5.6%)                      |            |
| <b>Cost as Barrier to Health</b>               |                                  |                                      |            |                                  |                                      |            |
| Medical care not sought because of cost        | 100% --                          | 100% --                              | --         | 66.7% (28.2,100%)                | 87.9% (76.1,99.6%)                   | 0.130      |
| All needed care not received due to cost       | 19.1% (9.5,28.7%)                | 19.4% (13.1,25.6%)                   | 0.967      | 41.1% (31.8,50.3%)               | 35.2% (28.4,42.0%)                   | 0.310      |
| <b>Adult Chronic Illness</b>                   |                                  |                                      |            |                                  |                                      |            |
| <b>Access to Health Services and Medicines</b> |                                  |                                      |            |                                  |                                      |            |
| Sought and received medical care               | 93.5% (84.4,102.7%)              | 90.8% (84.1,97.4%)                   | 0.641      | 95.8% (91.1,100%)                | 95.2% (91.9,98.5%)                   | 0.833      |
| Ever faced difficulties obtaining medication   | 72.4% (55.1,89.7%)               | 61.4% (49.7,73.1%)                   | 0.298      | 72.5% (61.7,83.3%)               | 73.1% (66.2,80.1%)                   | 0.918      |
| <b>Health Service Utilization</b>              |                                  |                                      |            |                                  |                                      |            |
| General practitioner visit(s)                  | 76.9% (59.6,94.3%)               | 71.0% (59.3,82.6%)                   | 0.567      | 56.7% (43.8,69.6%)               | 55.7% (47.4,64.0%)                   | 0.901      |
| Specialist visit(s)                            | 77.8% (61.0,94.5%)               | 77.4% (66.7,88.1%)                   | 0.970      | 70.0% (58.1,81.9%)               | 63.4% (55.4,71.4%)                   | 0.366      |
| Hospital visit(s)                              | 14.8% (0.5,29.1%)                | 32.3% (20.3,44.2%)                   | 0.088      | 15.0% (5.7,24.3%)                | 32.4% (24.6,40.2%)                   | 0.011      |
| <b>Cost as Barrier to Health</b>               |                                  |                                      |            |                                  |                                      |            |
| Medical care not sought because of cost        | 0.0% --                          | 100% --                              | ---        | 100% --                          | 100% --                              | ---        |
| All needed care not received due to cost       | 33.3% (14.3,52.3%)               | 23.8% (13.0,34.6%)                   | 0.349      | 39.3% (26.7,52.0%)               | 51.4% (43.1,59.7%)                   | 0.114      |
| Cannot afford medication                       | 61.3% (43.1,79.5%)               | 46.1% (34.6,57.5%)                   | 0.153      | 63.9% (52.5,75.3%)               | 65.3% (58.0,72.6%)                   | 0.837      |
